# Supplementary material for: Kidney-Sparing Methods for Extended-Field Intensity-Modulated Radiotherapy (EF-IMRT) in Cervical Carcinoma Treatment
Source: PubMed Central journal article supplement (PMC4892687; doi:10.1371/journal.pone.0156623), 2016-06-03
Supplement: pone.0156623.s001.pdf [file pone.0156623.s001.pdf]

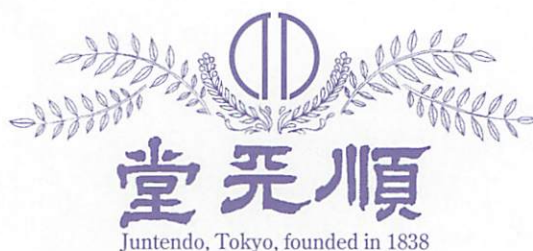

**Head Office**

Juntendo University

Faculties & Graduate Schools

Hongo 2-1-1, Bunkyo-ku

Tokyo 113-8421, Japan

Juntendo University

Faculty of Medicine &

Graduate School of Medicine

Hongo 2-1-1, Bunkyo-ku

Tokyo 113-8421, Japan

Juntendo University

Faculty of Health and Sports Science &

Graduate School of Health and Sports Science

Hiraga-gakuendai 1-1, Inzai City

Chiba 270-1695, Japan

Juntendo University

Faculty of Health Care and Nursing &

Graduate School of Health Care and Nursing

Takasu 2-5-1, Urayasu City

Chiba 279-0023, Japan

Juntendo University

Faculty of Health Sciences and Nursing

Omiya-cho 3-7-33, Mishima City

Shizuoka 411-8787, Japan

Hospital Ethics Committee  
Juntendo University Hospital

Date Oct/2/2015

Number of Research: 15-106

Title of Research:

Kidney-Sparing Methods for Extended-Field Intensity-Modulated Radiotherapy (EF-IMRT) in Cervical Carcinoma Treatment

Name(s) of Reseachers(s):

Hiroaki Kunogi

Nanae Yamaguchi

Yasuhisa Terao

Keisuke Sasai

This is to certify that the above mentioned research has been reviewed and approved by the committee.

Hiroyuki Daida ,M.D.,Ph.D

Director

Juntendo University Hospital

Hongo 3-1-3, Bunkyo-Ku

Tokyo, 113-8431, Japan
